# Supplementary material for: Ba6(Bi1−xEux)9B79O138 (0 ≤ x ≤ 1): synergetic changing of the wavelength of Bi3+ absorption and the red-to-orange emission ratio of Eu3+
Source: Royal Society of Chemistry journal article supplement (doi:10.1039/c5tc00923e), 2015-01-01
Supplement: c5tc00923e1.pdf [file c5tc00923e1.pdf]

Electronic Supplementary Information for

$\text{Ba}_6(\text{Bi}_{1-x}\text{Eu}_x)_9\text{B}_{79}\text{O}_{138}$  ( $0 \leq x \leq 1$ ): synergetic changing of the  
wavelength of  $\text{Bi}^{3+}$  absorption and the red-to-orange emission ratio  
of  $\text{Eu}^{3+}$

*Qiaoqi Li,<sup>a</sup> Rihong Cong,<sup>a\*</sup> Xianju Zhou,<sup>b</sup> Wenliang Gao,<sup>a</sup> Tao Yang<sup>a\*</sup>*

<sup>a</sup> College of Chemistry and Chemical Engineering, Chongqing University, Chongqing  
400044, People's Republic of China

<sup>b</sup> School of Science, Chongqing University of Posts and Telecommunications,  
Chongqing 400065, People's Republic of China.

\*Email: congrihong@cqu.edu.cn, taoyang@cqu.edu.cn; Tel: (86 23)65105065.

Table S1 Unit Cell parameters of  $\text{Ba}_6(\text{La}_{0.3-y}\text{Bi}_y\text{Eu}_{0.7})_9\text{B}_7\text{O}_{138}$  ( $0 \leq y \leq 0.3$ ) obtained from Le Bail fitting of the whole powder XRD patterns.

| $y$  | $a$ (Å) | $c$ (Å) | $V$ (Å <sup>3</sup> ) |
|------|---------|---------|-----------------------|
| 0    | 7.817   | 46.613  | 2466.9                |
| 0.10 | 7.818   | 46.582  | 2465.9                |
| 0.20 | 7.819   | 46.547  | 2464.7                |
| 0.30 | 7.821   | 46.507  | 2463.5                |

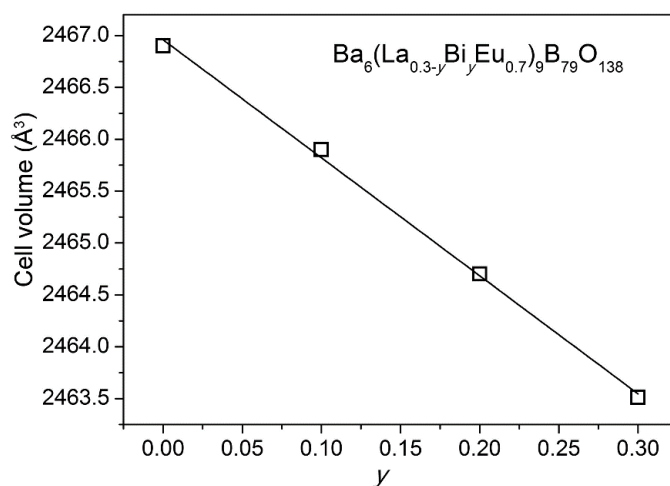

Fig. S1 Unit cell volume for  $\text{Ba}_6(\text{La}_{0.3-y}\text{Bi}_y\text{Eu}_{0.7})_9\text{B}_7\text{O}_{138}$  ( $0 \leq y \leq 0.3$ ).

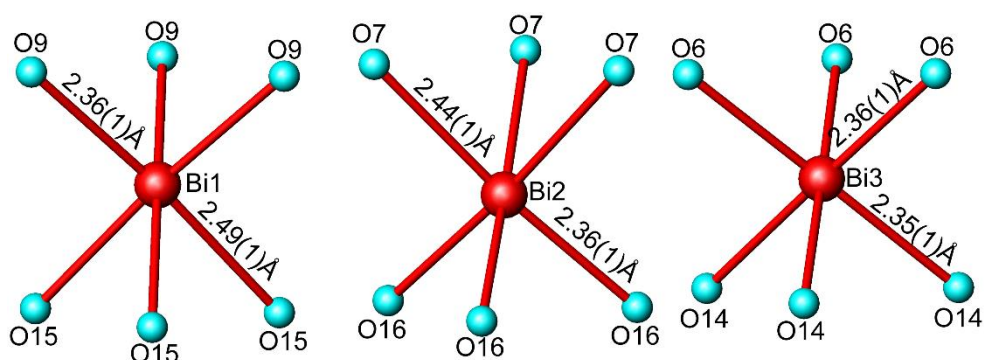

Fig. S2 Coordination environments for three different  $\text{Bi}^{3+}$  in the structure of  $\text{Ba}_6\text{Bi}_9\text{B}_7\text{O}_{138}$  (**BBBO**). The structural parameters were obtained from the reference (R. H. Cong, Z. Y. Zhou, Q. Q. Li, J. L. Sun, J. H. Lin, T. Yang, *J. Mater. Chem. C*, 2015, **3**, 4434-4437).
